# Supplementary material
Source: PubMed Central journal article supplement (PMC6130378)
Supplement: pnas.1806714115.sapp.pdf [file pnas.1806714115.sapp.pdf]

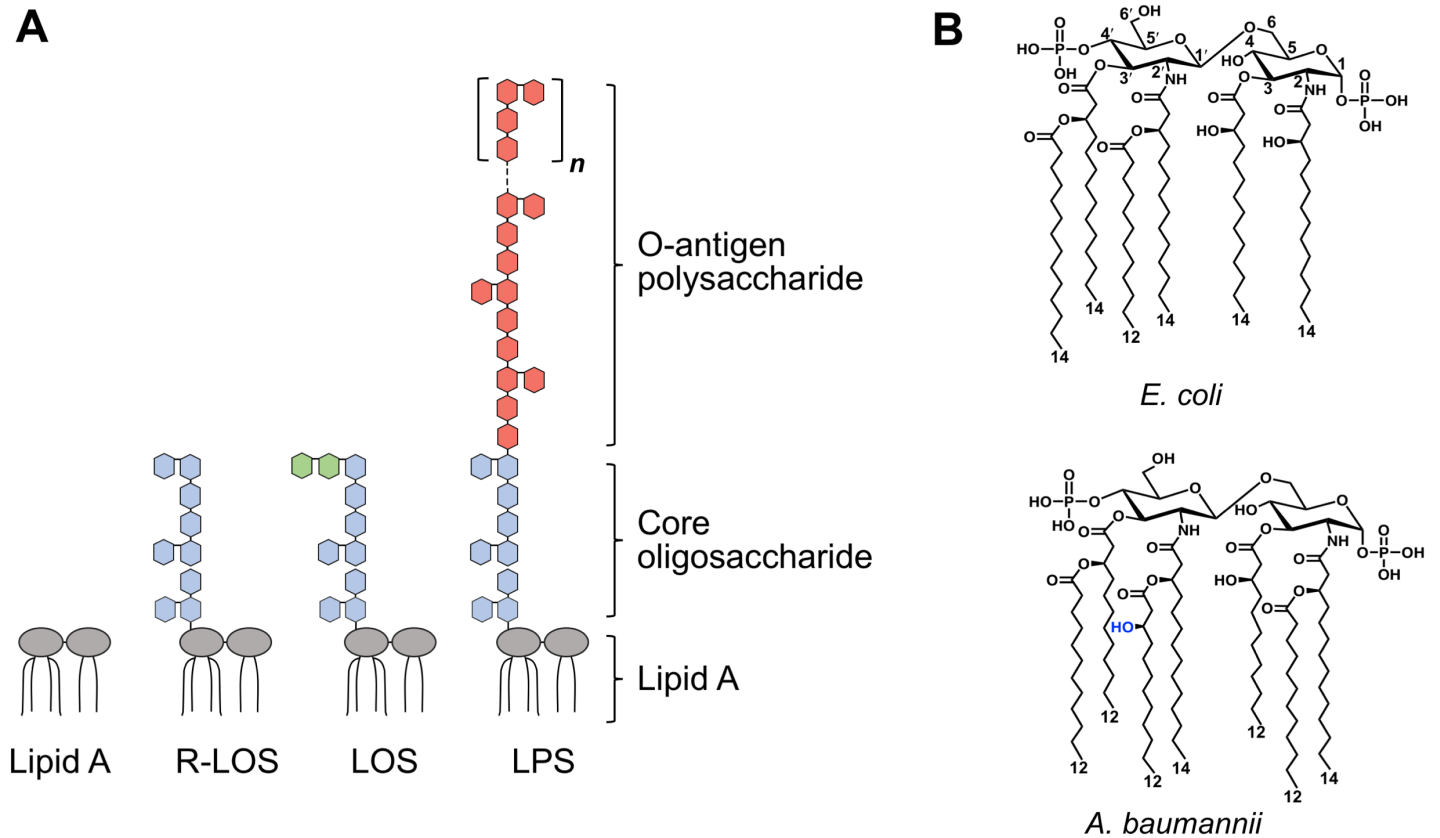

**Figure S1: Overview of LPS and LOS structure.** (A) A cartoon representation of the LOS and LPS structure of Gram-negative bacteria. The lipid A anchor, the core-oligosaccharide, and the O-antigen domains are indicated. Rough-LPS or R-LPS are LPS molecules lacking the O-antigen, as produced by *E. coli* K-12 strains. Organisms that synthesize LOS, such as *A. baumannii*, lack the machinery to produce the O-antigen polysaccharide. (B) The chemical structure of the lipid A moiety from either *E. coli* K-12 or *A. baumannii*. Isolates that are polymyxin resistant can modify their lipid A with additional moieties (not shown).

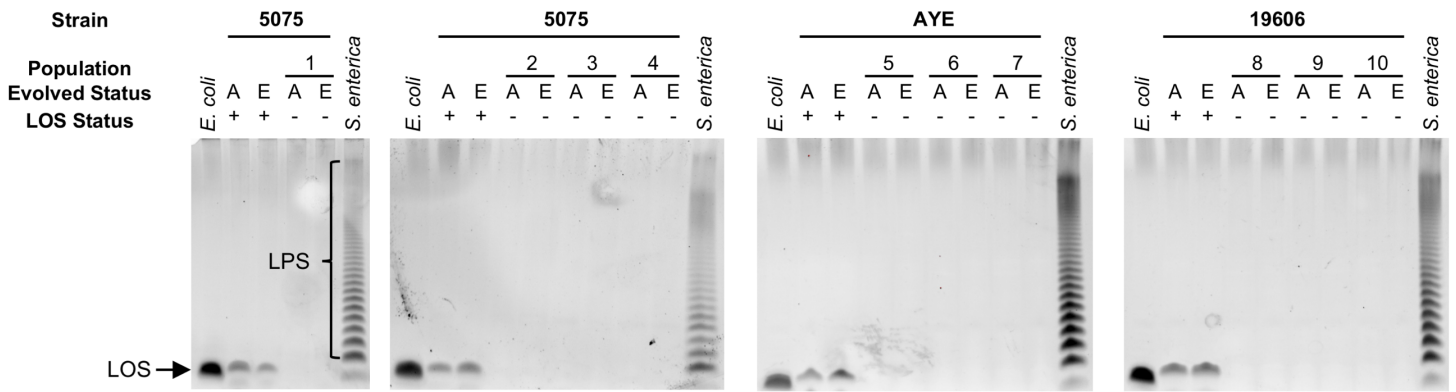

**Figure S2: Populations remain LOS-deficient after evolution experiment.** SDS-PAGE gels of proteinase K-treated cell lysates were stained for LPS using the ProQ-emerald 300 LPS staining kit. *E. coli* K-12 produces a LPS variant that is exclusively lipid A plus core sugars. *S. enterica* produces a full-length O-antigen, resulting in the characteristic banding pattern. *A. baumannii* produce LOS, which has a few additional sugars relative to *E. coli* K-12, causing it to run slightly higher (indicated by black arrow). For evolved status: A, ancestor and E, evolved.

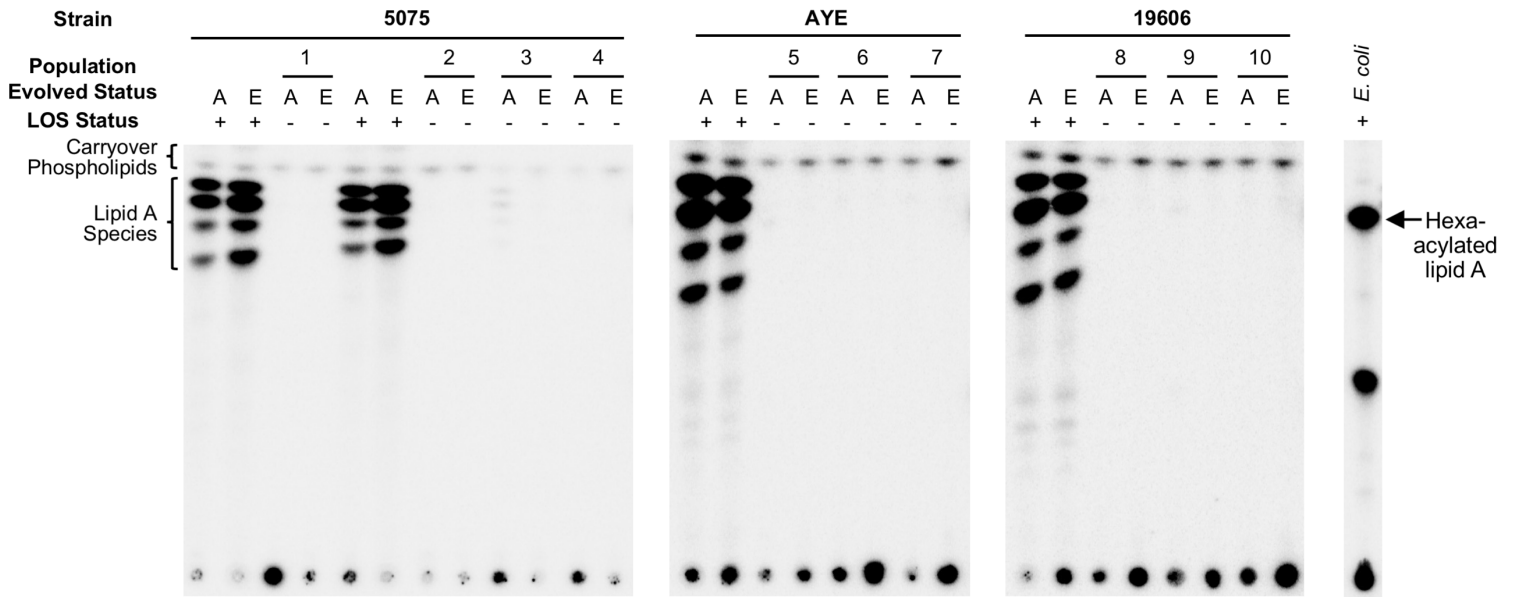

**Figure S3: Populations do not produce lipid A after evolution experiment.** TLC analysis of lipid A extracted from populations before and after evolution experiment. In each case, LOS-deficient populations do not produce any detectable radiolabeled lipid A. The four spots present in *A. baumannii* preps that do produce lipid A represent the four main lipid A species that are produced in a wild-type cell (43). The arrow indicates the major lipid A species for *E. coli* K-12. *E. coli* K-12 controls were run on the same TLC plate as *A. baumannii* samples.

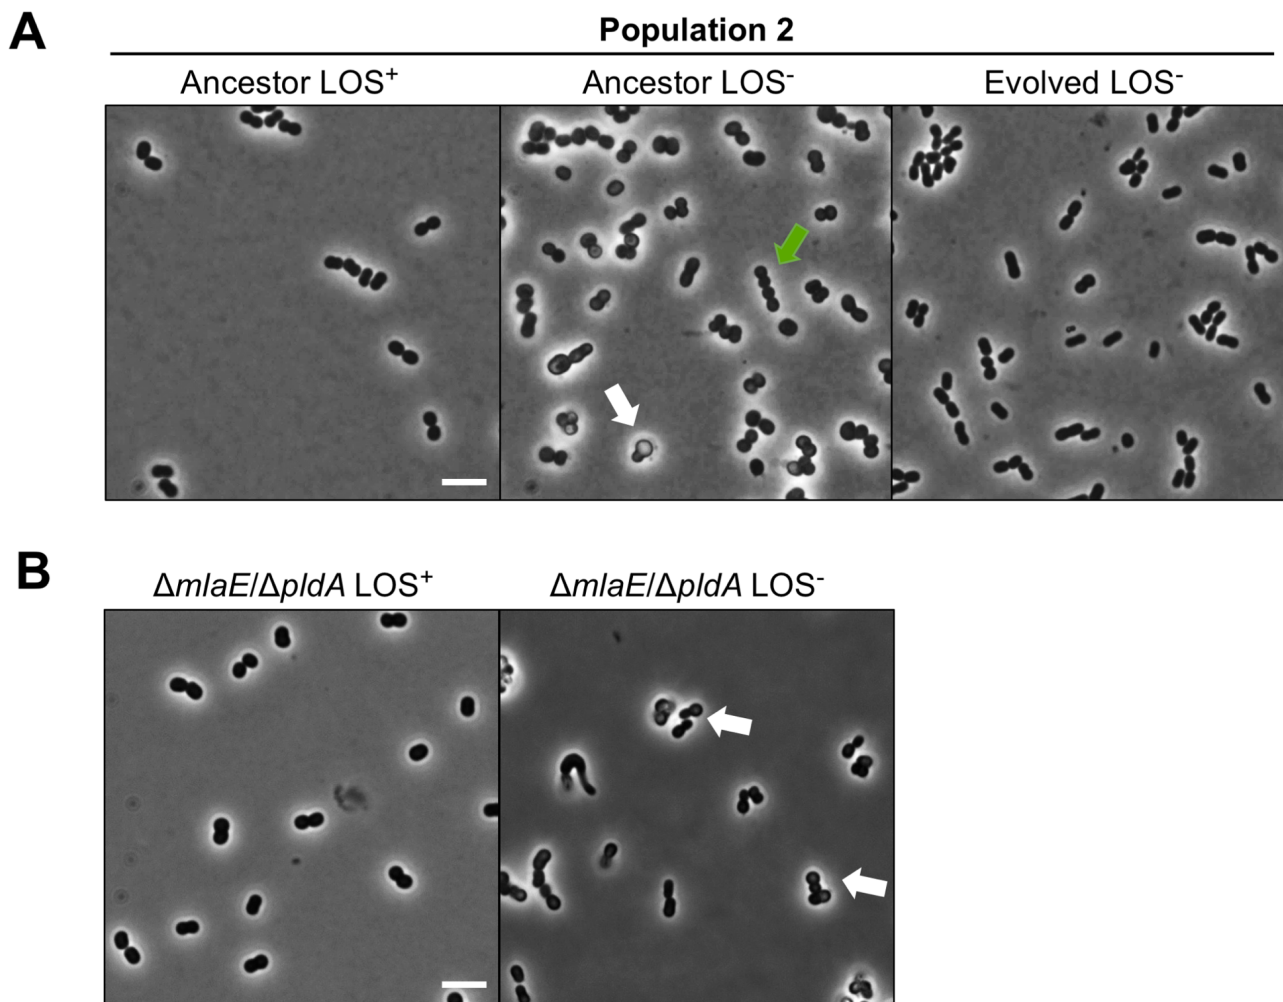

**Figure S4: Phase microscopy shows that altered morphologies are independent of *mIa* and *pldA*.** (A) Phase microscopy of wild-type, population 2 LOS-deficient ancestor, and population 2 LOS-deficient evolved show that while the LOS-deficient ancestor exhibits a wide array of morphologies that drastically differ from wild-type, the evolved population 2 LOS-deficient strain exhibits a relatively uniform morphology. (B) Phase microscopy of the 19606  $\Delta mlaE/\Delta pldA$  double mutant LOS-deficient strain exhibits clear morphological defects relative to its isogenic, LOS<sup>+</sup> parent. Scale bars are 5  $\mu\text{m}$ . Representative images of biological replicates are shown. We noticed cells with both atypical morphology (white arrow) and irregular division (green arrow).

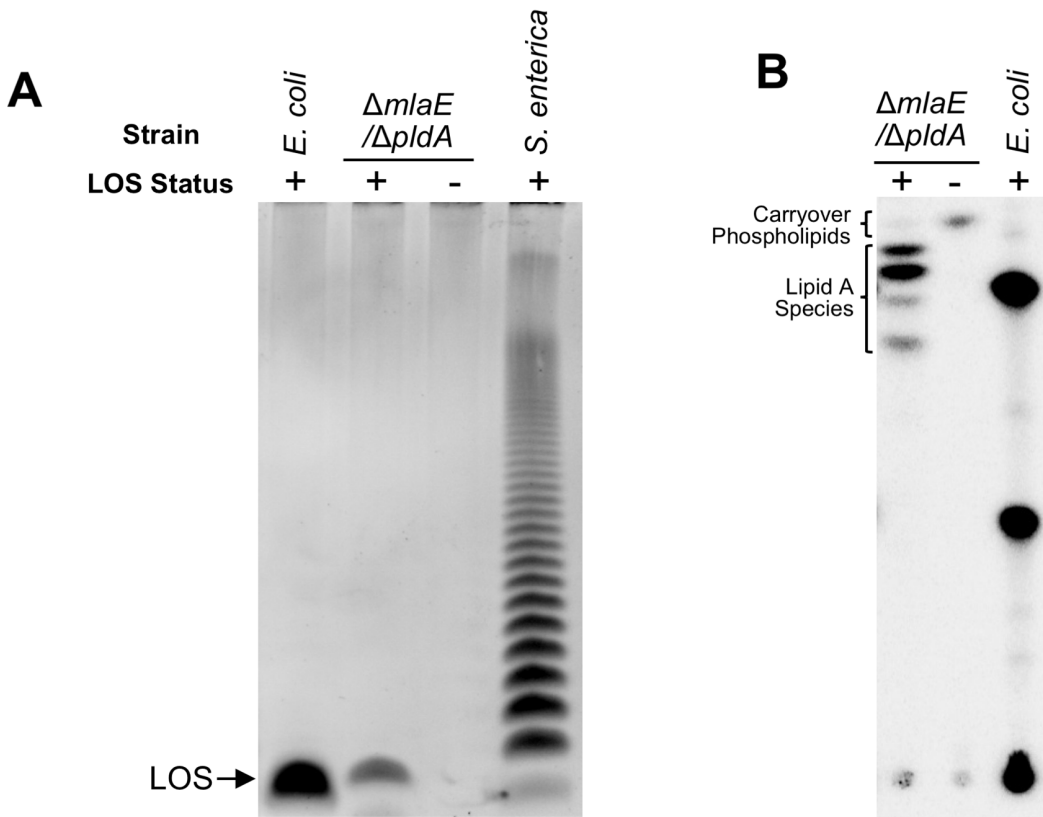

**Figure S5: The  $\Delta mlaE/\Delta pldA$  LOS-deficient strain lacks LOS and lipid A.** (A) SDS-PAGE separation and staining of proteinase-K treated lysate reveals that the LOS-deficient double mutant does not produce LOS. (B) TLC analysis of radiolabeled lipid A extractions confirm that the LOS-deficient, 19606  $\Delta mlaE/\Delta pldA$  double mutant does not produce lipid A.

**A**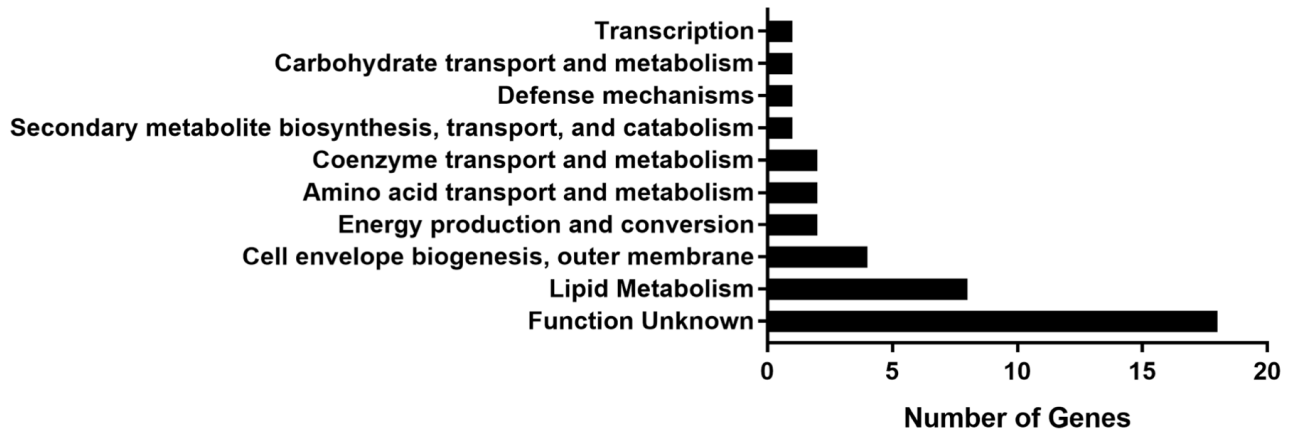**B**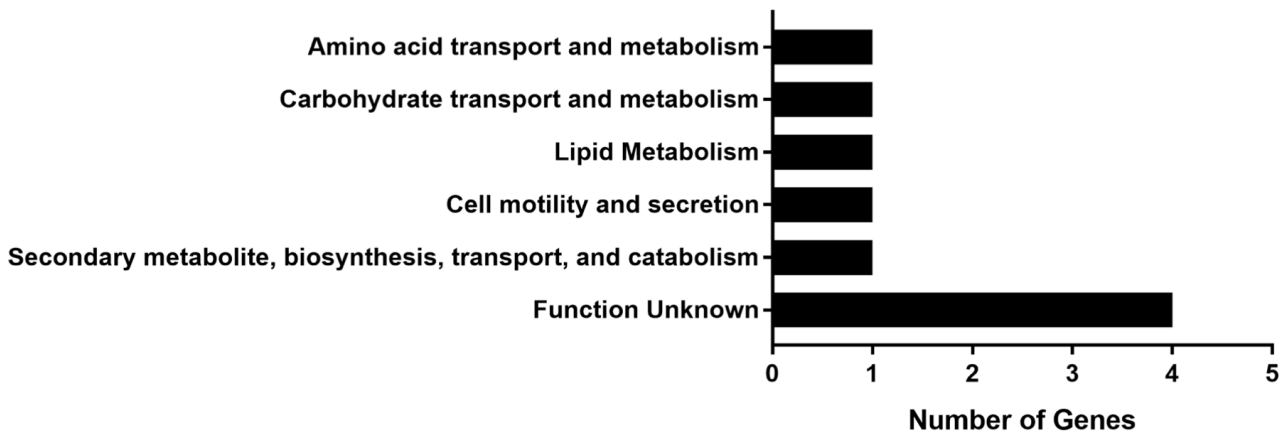

**Figure S6: Differentially regulated genes largely encode for proteins of unknown function.** Upregulated (A) and downregulated (B) genes in the evolved LOS<sup>-</sup> versus LOS<sup>+</sup> distributed by COG category. A large number of both up- and down-regulated genes have no predicted function. The two COG categories with a higher frequency of genes assigned to it are lipid metabolism and cell envelope biogenesis.

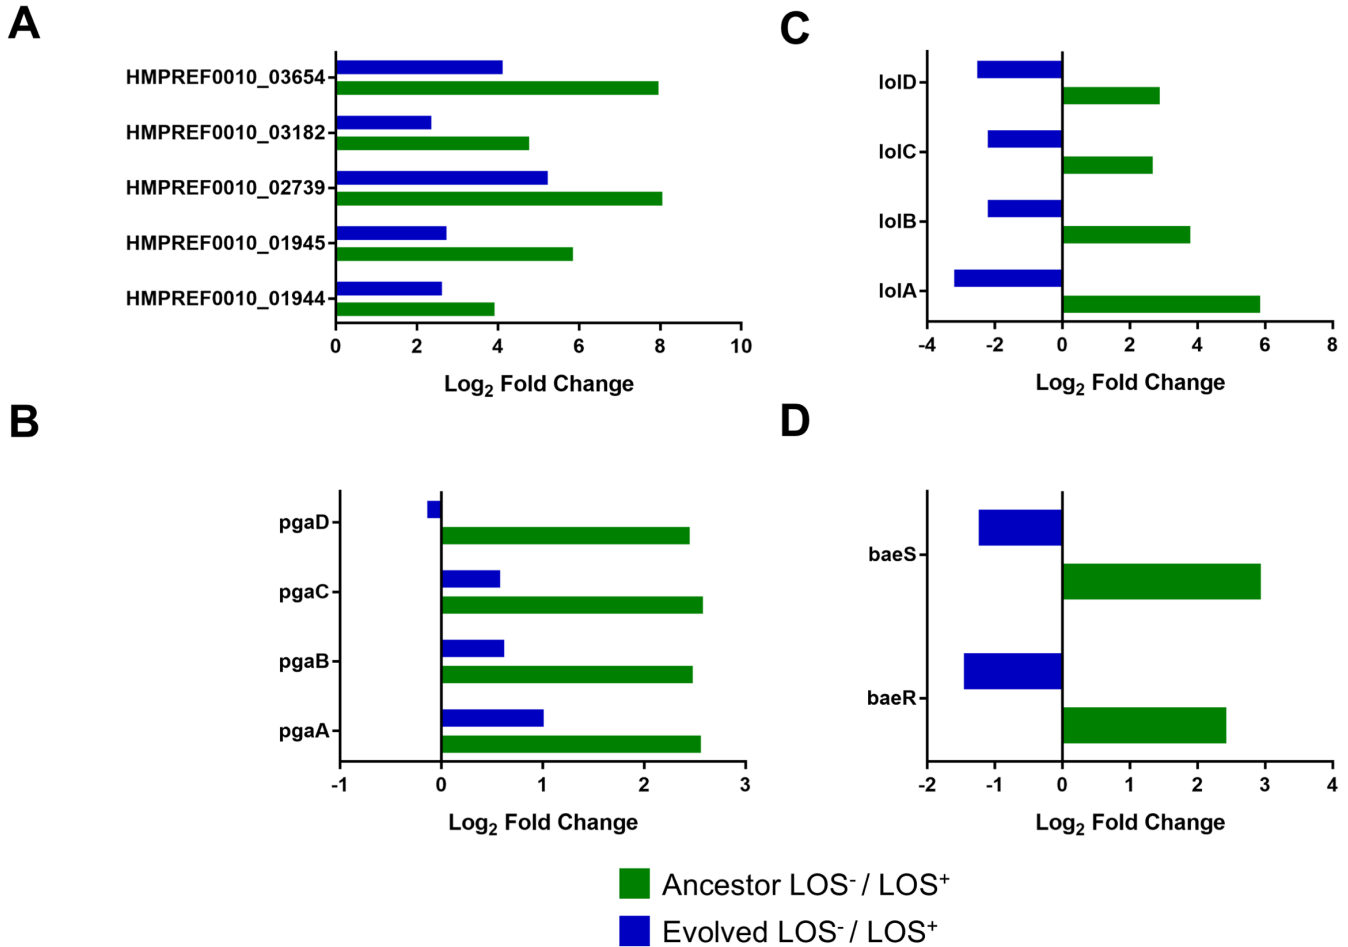

**Figure S7: Gene expression for lipoproteins, lipoprotein transport, PNAG biosynthesis, and *baeRS* is decreased after evolution.** (A) The expression of five lipoproteins which have been shown to be a conserved response to LOS-deficiency in *A. baumannii*. After evolution, the evolved LOS<sup>-</sup> bacteria show a decrease in overall expression relative to LOS<sup>+</sup> cells; however, these lipoproteins are still expressed. HMPREF0010\_01944, HMPREF0010\_01945, and HMPREF0010\_02739 have been shown to be cell surface exposed (26). (B) The expression of genes involved in PNAG biosynthesis. After the evolution experiment, the evolved LOS<sup>-</sup> no longer upregulate any *pga* genes. Similar trends were observed for the lipoprotein transport pathway (C) and *baeRS* two-component system (D). In (A-D), the x-axis is log<sub>2</sub> fold change. Green bars indicate expression for ancestor LOS<sup>-</sup> / ancestor LOS<sup>+</sup> and blue bars indicate expression for evolved LOS<sup>-</sup> / evolved LOS<sup>+</sup>.

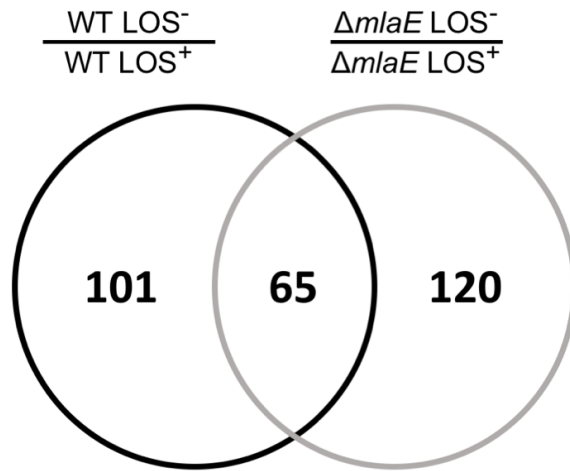

**Figure S8: A 19606  $\Delta mlaE$   $LOS^-$  has a unique set of genes that are differentially regulated.** A Venn-Diagram showing unique or conserved responses to  $LOS$ -deficiency between wild-type and a  $\Delta mlaE$  mutant. All genes in the Venn-Diagram had fold-change values  $\log_2$  of  $\pm 2$ .



**Table S1. Antibiotic resistance profiles for additional populations**

| Population | Strain | Evolution Status   | Polymyxin B* | Vancomycin* | Daptomycin* | Bacitracin* |
|------------|--------|--------------------|--------------|-------------|-------------|-------------|
| 1          | 5075   | Ancestor LOS-      | 32           | 0.25        | 2           | 0.38        |
|            |        | Evolved LOS-       | 1024         | 3           | 96          | 6           |
|            |        | <b>Fold Change</b> | <b>32</b>    | <b>12</b>   | <b>48</b>   | <b>15</b>   |
| 5          | AYE    | Ancestor LOS-      | 128          | 0.25        | 3           | 0.75        |
|            |        | Evolved LOS-       | 512          | 4           | 24          | 3           |
|            |        | <b>Fold Change</b> | <b>4</b>     | <b>16.0</b> | <b>8</b>    | <b>4</b>    |
| 8          | 19606  | Ancestor LOS-      | 256          | 0.38        | 3           | 0.5         |
|            |        | Evolved LOS-       | 1024         | 4           | 96          | 6           |
|            |        | <b>Fold Change</b> | <b>4</b>     | <b>10.5</b> | <b>32</b>   | <b>12</b>   |

\* All units are in µg/mL

**Table S2: All mutations accumulated in evolved LOS<sup>-</sup> populations**

| Evolution/LOS Status | Strain      | Population       | Locus                                          | Gene                                           | Mutation                                       | Sequence   | Impact*    | Frequency† |
|----------------------|-------------|------------------|------------------------------------------------|------------------------------------------------|------------------------------------------------|------------|------------|------------|
| Evolved LOS-         | 5075        | Population 1     | ABUW_0289                                      | <i>PBP1A</i>                                   | Insertion                                      | CTTGGTGA   | Val349fs   | 97.89      |
|                      |             |                  | ABUW_3259                                      | <i>mIaA</i>                                    | Insertion                                      | CCAGCTAATT | Gln136fs   | 98.91      |
|                      |             |                  | ABUW_1745                                      | <i>lpxA</i>                                    | SNP                                            | C>T        | Gln255stop | 100        |
|                      |             | Population 2     | ABUW_0384                                      | <i>mIaE</i>                                    | Deletion                                       | C519       | Leu175fs   | 99.93      |
|                      |             |                  | ABUW_1199                                      | <i>smr/mutS2</i>                               | SNP                                            | A>T        | Gln162Leu  | 99.89      |
|                      |             |                  | ABUW_1664 <><br>ABUW_1666                      | --                                             | Insertion                                      | GTTCGAG    | --         | 99.42      |
|                      |             |                  | ABUW_1803                                      | <i>pIaA</i>                                    | Replacement                                    | TT>AAAG    | Leu22fs    | 90.34      |
|                      |             |                  | ABUW_0152                                      | <i>lpxC</i>                                    | Large Insertion Confirmed by Sanger Sequencing |            |            |            |
|                      |             | Population 3     | ABUW_0385                                      | <i>mIaD</i>                                    | Insertion                                      | T          | Ile161fs   | 100        |
|                      |             |                  | ABUW_1199                                      | <i>smr/mutS2</i>                               | SNP                                            | A>T        | Gln162Leu  | 100        |
|                      |             |                  | ABUW_1803                                      | <i>pIaA</i>                                    | Deletion                                       | T84        | Tyr28fs    | 95.65      |
|                      |             |                  | ABUW_3566                                      | <i>pgsA</i>                                    | SNP                                            | C>T        | Ala56Val   | 87.69      |
|                      |             |                  | ABUW_0152                                      | <i>lpxC</i>                                    | Insertion                                      | ATTT       | Gly108fs   | 90         |
|                      |             | Population 4     | ABUW_0289                                      | <i>PBP1A</i>                                   | Deletion                                       | T2007      | Asn669fs   | 100        |
|                      |             |                  | ABUW_1803                                      | <i>pIaA</i>                                    | Deletion                                       | 731T       | Val246fs   | 100        |
|                      | ABUW_3566   |                  | <i>pgsA</i>                                    | SNP                                            | G>T                                            | Ala108Asp  | 100        |            |
|                      | ABUW_0152   |                  | <i>lpxC</i>                                    | Large Insertion Confirmed by Sanger Sequencing |                                                |            |            |            |
|                      | AYE         | Population 5     | ABAYE0388                                      | <i>mIaC</i>                                    | Deletion                                       | 363T       | Tyr122fs   | 94.3       |
|                      |             |                  | ABAYE1587                                      | <i>lpxA</i>                                    | Large Insertion Confirmed by Sanger Sequencing |            |            |            |
|                      |             | Population 6     | ABAYE0388                                      | <i>mIaC</i>                                    | Deletion                                       | 363T       | Tyr122fs   | 100        |
|                      |             |                  | ABAYE1587                                      | <i>lpxA</i>                                    | Large Insertion Confirmed by Sanger Sequencing |            |            |            |
|                      |             | Population 7     | ABAYE0388                                      | <i>mIaC</i>                                    | Deletion                                       | 272C       | Thr91fs    | 100        |
|                      |             |                  | ABAYE3503                                      | <i>H-NS</i>                                    | SNP                                            | G>A        | Arg91His   | 100        |
|                      | ABAYE1587   | <i>lpxA</i>      | Large Insertion Confirmed by Sanger Sequencing |                                                |                                                |            |            |            |
|                      | 19606       | Population 8     | HMPREF0010_00357                               | <i>lpxA</i>                                    | SNP                                            | C>T        | Gln72stop  | 99.94      |
|                      |             |                  | HMPREF0010_00206<br><>                         | --                                             | Insertion                                      | T          | --         | 100        |
|                      |             |                  | HMPREF0010_00207                               |                                                |                                                |            |            |            |
|                      |             | Population 9     | HMPREF0010_02485                               | <i>ompR</i>                                    | SNP                                            | C>T        | Arg31Cys   | 100        |
|                      |             |                  | HMPREF0010_02484                               | <i>ompR</i>                                    | SNP                                            | C>A        | Pro10Tyr   | 100        |
|                      |             |                  | HMPREF0010_00357                               | <i>lpxA</i>                                    | SNP                                            | C>T        | Gln72stop  | 98.39      |
| Population 10        |             | HMPREF0010_02484 | <i>envZ</i>                                    | SNP                                            | G>T                                            | Met264Ile  | 100        |            |
|                      |             | HMPREF0010_02484 | <i>envZ</i>                                    | SNP                                            | C>A                                            | synonymous | 98.53      |            |
| HMPREF0010_02607     | <i>mIaC</i> | Deletion         | 363-364 TT                                     | Tyr122fs                                       | 100                                            |            |            |            |

| Evolution/LOS Status | Strain | Population    | Locus            | Gene        | Mutation                                       | Sequence | Impact* | Frequency† |
|----------------------|--------|---------------|------------------|-------------|------------------------------------------------|----------|---------|------------|
| Evolved LOS-         | 19606  | Population 10 | HMPREF0010_03503 | <i>lpxC</i> | Large Insertion Confirmed by Sanger Sequencing |          |         |            |

\*fs refers to frame shift

† Frequency refers to the number of times the SNP was identified relative to the total number of reads available for that sequence.

**Table S3: All mutations accumulated in ancestor and evolved populations**

| Evolution/LOS Status | Strain        | Population   | Locus                     | Gene                | Mutation                                       | Sequence                                       | Impact*    | Frequency† |  |
|----------------------|---------------|--------------|---------------------------|---------------------|------------------------------------------------|------------------------------------------------|------------|------------|--|
| Ancestor LOS-        | 5075          | Population 1 | ABUW_1745                 | <i>lpxA</i>         | SNP                                            | C>T                                            | Gln255stop | 100        |  |
|                      |               |              | ABUW_3827                 | <i>hypothetical</i> | Insertion                                      | 462A                                           | Gln155fs   | 88.64      |  |
|                      |               | Population 2 | ABUW_0384                 | <i>mIaE</i>         | Deletion                                       | 519C                                           | Leu175fs   | 99.82      |  |
|                      |               |              | ABUW_1199                 | <i>smr/mutS2</i>    | SNP                                            | A>T                                            | Gln162Leu  | 99.71      |  |
|                      |               |              | ABUW_1664 <><br>ABUW_1666 | --                  | Insertion                                      | GTTCGAG                                        | --         | 99.72      |  |
|                      |               | Population 3 | ABUW_0152                 | <i>lpxC</i>         | Large Insertion Confirmed by Sanger Sequencing |                                                |            |            |  |
|                      |               |              | ABUW_1199                 | <i>smr/mutS2</i>    | SNP                                            | A>T                                            | Gln162Leu  | 100        |  |
|                      |               | Population 4 | ABUW_0152                 | <i>lpxC</i>         | Insertion                                      | ATTT                                           | Gly108fs   | 90         |  |
|                      |               |              | ABUW_1199                 | <i>smr/mutS2</i>    | SNP                                            | A>T                                            | Gln162Leu  | 100        |  |
|                      |               |              | ABUW_1664 <><br>ABUW_1666 | --                  | Insertion                                      | GTTCGAG                                        | --         | 100        |  |
|                      | AYE           | Population 5 | ABUW_0152                 | <i>lpxC</i>         | Large Insertion Confirmed by Sanger Sequencing |                                                |            |            |  |
|                      |               |              | ABAYE0388                 | <i>mIaC</i>         | Deletion                                       | 363T                                           | Tyr122fs   | 94.3       |  |
|                      |               | Population 6 | ABAYE1587                 | <i>lpxA</i>         | Large Insertion Confirmed by Sanger Sequencing |                                                |            |            |  |
|                      |               |              | ABAYE0388                 | <i>mIaC</i>         | Deletion                                       | 363T                                           | Tyr122fs   | 91.18      |  |
|                      |               | Population 7 | ABAYE1587                 | <i>lpxA</i>         | Large Insertion Confirmed by Sanger Sequencing |                                                |            |            |  |
|                      |               |              | ABAYE0388                 | <i>mIaC</i>         | Deletion                                       | 272C                                           | Thr91fs    | 100        |  |
|                      | 19606         | Population 8 | ABAYE1587                 | <i>lpxA</i>         | Large Insertion Confirmed by Sanger Sequencing |                                                |            |            |  |
|                      |               |              | HMPREF0010_00357          | <i>lpxA</i>         | SNP                                            | C>T                                            | Gln72stop  | 99.94      |  |
|                      |               | Population 9 | HMPREF0010_00357          | <i>lpxA</i>         | SNP                                            | C>T                                            | Gln72stop  | 100        |  |
|                      | Ancestor LOS+ | 5075         | Population 10             | HMPREF0010_003502   | <i>lpxC</i>                                    | Large Insertion Confirmed by Sanger Sequencing |            |            |  |
| Population 1         |               |              | --                        | --                  | --                                             | --                                             | --         | --         |  |
|                      |               | Population 2 | ABUW_2146                 | <i>rnd</i>          | Insertion                                      | 493TA                                          | Lys165fs   | 96.99      |  |

| Evolution/LOS Status | Strain       | Population    | Locus                     | Gene                      | Mutation         | Sequence  | Impact*   | Frequency† |       |
|----------------------|--------------|---------------|---------------------------|---------------------------|------------------|-----------|-----------|------------|-------|
|                      | 5075         | Population 3  | ABUW_2146                 | <i>rnd</i>                | Insertion        | 493TA     | Lys165fs  | 96.99      |       |
|                      |              | Population 4  | ABUW_2146                 | <i>rnd</i>                | Insertion        | 493TA     | Lys165fs  | 96.99      |       |
|                      | AYE          | Population 5  | --                        | --                        | --               | --        | --        | --         |       |
|                      |              | Population 6  | --                        | --                        | --               | --        | --        | --         |       |
|                      |              | Population 7  | --                        | --                        | --               | --        | --        | --         |       |
|                      | 19606        | Population 8  | --                        | --                        | --               | --        | --        | --         |       |
|                      |              | Population 9  | --                        | --                        | --               | --        | --        | --         |       |
|                      |              | Population 10 | --                        | --                        | --               | --        | --        | --         |       |
|                      | Evolved LOS+ | 5075          | Population 1              | ABUW_1199                 | <i>smr/mutS2</i> | SNP       | A>T       | Gln162Leu  | 99.17 |
|                      |              |               |                           | ABUW_1664 <><br>ABUW_1666 | --               | Insertion | GAGTTTA   | --         | 100   |
| ABUW_2471            |              |               |                           | <i>dcaF</i>               | SNP              | C>T       | Pro44Leu  | 99.52      |       |
| Population 2         |              |               | ABUW_0913                 | <i>pckG</i>               | SNP              | G>A       | Arg157His | 99.71      |       |
|                      |              |               | ABUW_1199                 | <i>smr/mutS2</i>          | SNP              | C>T       | Gln162Leu | 99.82      |       |
| Population 3         |              |               | ABUW_1664 <><br>ABUW_1666 | --                        | Insertion        | GTTCGAG   | --        | 99.5       |       |
|                      |              |               | ABUW_0913                 | <i>pckG</i>               | SNP              | G>A       | Arg157His | 99.71      |       |
|                      |              |               | ABUW_1199                 | <i>smr/mutS2</i>          | SNP              | C>T       | Gln162Leu | 99.82      |       |
| Population 4         |              |               | ABUW_1664 <><br>ABUW_1666 | --                        | Insertion        | GTTCGAG   | --        | 99.5       |       |
|                      |              |               | ABUW_0913                 | <i>pckG</i>               | SNP              | G>A       | Arg157His | 99.71      |       |
|                      |              |               | ABUW_1199                 | <i>smr/mutS2</i>          | SNP              | C>T       | Gln162Leu | 99.82      |       |
| Population 4         |              |               | ABUW_1664 <><br>ABUW_1666 | --                        | Insertion        | GTTCGAG   | --        | 99.5       |       |

| Evolution/LOS Status | Strain | Population    | Locus                                      | Gene | Mutation  | Sequence | Impact* | Frequency† |
|----------------------|--------|---------------|--------------------------------------------|------|-----------|----------|---------|------------|
| Evolved LOS+         | AYE    | Population 5  | --                                         | --   | --        | --       | --      | --         |
|                      | AYE    | Population 6  | --                                         | --   | --        | --       | --      | --         |
|                      | AYE    | Population 7  | --                                         | --   | --        | --       | --      | --         |
|                      | 19606  | Population 8  | HMPREF0010_00206<br><><br>HMPREF0010_00207 | --   | Insertion | T        | --      | 100        |
|                      | 19606  | Population 9  | HMPREF0010_00206<br><><br>HMPREF0010_00207 | --   | Insertion | T        | --      | 100        |
|                      | 19606  | Population 10 | HMPREF0010_00206<br><><br>HMPREF0010_00207 | --   | Insertion | T        | --      | 100        |

\* fs refers to frameshift

† Frequency refers to the number of times the SNP was identified relative to the total number of reads available for that sequence.

**Table S4: Transcriptomic fold changes for the Mla-independent gene set**

| Mla-Independent Fold Changes |                                        |                                                 |
|------------------------------|----------------------------------------|-------------------------------------------------|
| Locus*                       | WT LOS <sup>-</sup> / LOS <sup>+</sup> | <i>mlaE</i> LOS <sup>-</sup> / LOS <sup>+</sup> |
| 03356                        | 10.42                                  | 9.64                                            |
| 02733                        | 9.51                                   | 9.13                                            |
| 00185                        | 7.94                                   | 7.84                                            |
| 02739                        | 8.49                                   | 7.8                                             |
| 03654                        | 8.58                                   | 7.06                                            |
| 00186                        | 8.15                                   | 6.98                                            |
| 104195                       | 5.52                                   | 6.04                                            |
| 01945                        | 6.77                                   | 5.45                                            |
| <i>macA</i>                  | 5.95                                   | 5.1                                             |
| <i>lolA</i>                  | 5.84                                   | 5.01                                            |
| 01944                        | 4.83                                   | 4.95                                            |
| 03355                        | 5.14                                   | 4.92                                            |
| 00247                        | 3.25                                   | 4.68                                            |
| <i>macB</i>                  | 5.68                                   | 4.47                                            |
| 02727                        | 4.16                                   | 4.4                                             |
| 02568                        | 5.39                                   | 4.36                                            |
| 02579                        | 5.02                                   | 4.05                                            |
| 03182                        | 4.46                                   | 4.05                                            |
| <i>macC</i>                  | 5.45                                   | 3.93                                            |
| <i>ompW</i>                  | 3.3                                    | 3.88                                            |
| 02249                        | 3.88                                   | 3.85                                            |
| 00385                        | 2.63                                   | 3.71                                            |
| 00069                        | 4.15                                   | 3.69                                            |
| <i>lolB</i>                  | 4.32                                   | 3.66                                            |
| 02797                        | 3.23                                   | 3.51                                            |
| 02675                        | 3.76                                   | 3.47                                            |
| 00266                        | 3.28                                   | 3.42                                            |
| <i>mIaB</i>                  | 3.98                                   | 3.1                                             |
| <i>argA</i>                  | 3.4                                    | 3.1                                             |
| 02025                        | 3.34                                   | 3.07                                            |
| <i>kynU</i>                  | 3.67                                   | 2.83                                            |
| 00694                        | 3.36                                   | 2.83                                            |
| <i>baeS</i>                  | 3.37                                   | 2.81                                            |
| <i>mIaC</i>                  | 3.4                                    | 2.7                                             |
| 02248                        | 2.42                                   | 2.67                                            |
| <i>dsbA</i>                  | 3.95                                   | 2.66                                            |

|             |       |       |
|-------------|-------|-------|
| 02071       | 3.35  | 2.64  |
| 03516       | 2.87  | 2.64  |
| 02462       | 3.41  | 2.63  |
| 00184       | 2.78  | 2.55  |
| 01616       | 2.25  | 2.55  |
| 03111       | 2.04  | 2.43  |
| 03519       | 2.09  | 2.38  |
| 03113       | 2.03  | 2.27  |
| 03145       | 3.08  | 2.26  |
| 01939       | 2.49  | 2.25  |
| 02269       | 2.97  | 2.22  |
| <i>proY</i> | 2.53  | 2.2   |
| 00792       | 3.17  | 2.13  |
| 03727       | 2.27  | 2.1   |
| 00990       | 2.69  | 2.07  |
| <i>csgG</i> | -2.53 | -2.14 |
| 00606       | -4.31 | -2.16 |
| 03013       | -2.68 | -2.21 |
| 03661       | -2.08 | -2.31 |
| <i>rhtB</i> | -3.17 | -2.37 |
| 104360      | -3.62 | -2.42 |
| <i>pgpB</i> | -2.48 | -2.43 |
| 03531       | -3.47 | -2.68 |
| 03347       | -3.19 | -2.82 |
| 00516       | -3.05 | -2.88 |
| 00599       | -2.41 | -3.42 |
| 03348       | -4.47 | -4.96 |
| 00597       | -2.74 | -5.08 |
| 00598       | -3.49 | -5.38 |

\*Locus is preceded by HMPREF0010\_ for unannotated genes



**Table S5: Transcriptomic fold changes for the Mla-independent gene set**

| Mla-dependent Fold Changes |                                       |                                                |
|----------------------------|---------------------------------------|------------------------------------------------|
| Locus*                     | WT LOS <sup>-</sup> /LOS <sup>+</sup> | <i>mlaE</i> LOS <sup>-</sup> /LOS <sup>+</sup> |
| 00466                      | -0.68                                 | 7.67                                           |
| 00467                      | -1.49                                 | 7.1                                            |
| 00468                      | -0.93                                 | 6.73                                           |
| 00469                      | -1.63                                 | 6.51                                           |
| 00470                      | -0.62                                 | 5.7                                            |
| 00471                      | -0.24                                 | 5.16                                           |
| 00472                      | 0.31                                  | 4.66                                           |
| 01245                      | -0.15                                 | 4.46                                           |
| 00194                      | -1.32                                 | 4.24                                           |
| <i>acoA</i>                | -1.17                                 | 4.11                                           |
| 00473                      | -0.11                                 | 4.1                                            |
| 104260                     | 1.57                                  | 4.1                                            |
| 00463                      | -0.45                                 | 4.09                                           |
| <i>benA</i>                | 1.39                                  | 4.02                                           |
| <i>acoB</i>                | -1.39                                 | 3.94                                           |
| <i>aroP3</i>               | -1.71                                 | 3.94                                           |
| <i>benB</i>                | 0.78                                  | 3.92                                           |
| 00193                      | -2.16                                 | 3.77                                           |
| 00192                      | -2.53                                 | 3.76                                           |
| <i>atoE</i>                | -1.47                                 | 3.73                                           |
| <i>acoC</i>                | -1.34                                 | 3.71                                           |
| 00474                      | 0.49                                  | 3.7                                            |
| <i>lipA2</i>               | -1.22                                 | 3.69                                           |
| 104270                     | -1.69                                 | 3.5                                            |
| 02254                      | -1.64                                 | 3.48                                           |
| <i>lpdA2</i>               | -1.15                                 | 3.46                                           |
| 104275                     | -1.88                                 | 3.45                                           |
| 00637                      | -1.81                                 | 3.4                                            |
| 104765                     | 0                                     | 3.35                                           |
| <i>mmsA</i>                | -1.16                                 | 3.33                                           |
| 00396                      | 1.89                                  | 3.26                                           |
| <i>budC</i>                | -0.57                                 | 3.25                                           |
| <i>mmsB</i>                | -0.97                                 | 3.18                                           |
| <i>paaF</i>                | -2.14                                 | 3.15                                           |
| <i>paaJ</i>                | -2.17                                 | 3.12                                           |

|             |       |      |
|-------------|-------|------|
| caiD        | -1.63 | 3.03 |
| bdhA        | -1.57 | 3    |
| 00673       | -0.25 | 2.98 |
| 00680       | 0.24  | 2.94 |
| 00646       | -1.15 | 2.88 |
| paaE        | -1.98 | 2.83 |
| <i>paal</i> | -2.17 | 2.81 |
| benC        | 0.13  | 2.77 |
| 01003       | -1.84 | 2.75 |
| 01101       | -0.51 | 2.75 |
| <i>paaX</i> | -2.15 | 2.73 |
| 03117       | 1.42  | 2.7  |
| paaB        | -1.98 | 2.69 |
| <i>paaK</i> | -2.09 | 2.69 |
| 03057       | 1.17  | 2.68 |
| 03231       | -0.22 | 2.68 |
| paaC        | -2.13 | 2.65 |
| <i>paal</i> | -2.36 | 2.64 |
| 03725       | 1.14  | 2.62 |
| vanK        | 0.68  | 2.58 |
| paaH        | -1.88 | 2.55 |
| pobA        | -0.11 | 2.47 |
| 02778       | -0.44 | 2.45 |
| 03058       | 1.28  | 2.43 |
| 03115       | 1.58  | 2.42 |
| 03131       | 1.54  | 2.42 |
| 01007       | -1.84 | 2.41 |
| 02800       | -0.83 | 2.4  |
| paaY        | -1.9  | 2.36 |
| 01142       | 1.91  | 2.36 |
| mgh         | -2.12 | 2.31 |
| 02412       | 0.7   | 2.29 |
| vanA        | 0.52  | 2.29 |
| acsA        | 0.72  | 2.29 |
| 02936       | 1.9   | 2.28 |
| 01005       | -1.92 | 2.27 |
| 01008       | -2.03 | 2.27 |
| 00005       | 0.15  | 2.26 |
| 03119       | 1.83  | 2.26 |

|              |       |       |
|--------------|-------|-------|
| 03121        | 1.66  | 2.25  |
| 03533        | 0.49  | 2.25  |
| 01010        | -2.25 | 2.24  |
| 03112        | 1.95  | 2.23  |
| <i>pcaT</i>  | -0.08 | 2.22  |
| 01011        | -2.1  | 2.22  |
| 23485        | 0.88  | 2.21  |
| <i>paaZ</i>  | -1.58 | 2.2   |
| 03724        | 1.11  | 2.2   |
| 01271        | 1.05  | 2.18  |
| 00635        | -0.27 | 2.16  |
| 01006        | -0.74 | 2.16  |
| 02419        | 0.66  | 2.16  |
| 03110        | 1.65  | 2.16  |
| 02411        | 0.85  | 2.14  |
| 00275        | 1.73  | 2.12  |
| <i>benP1</i> | 0.56  | 2.12  |
| <i>actP</i>  | -0.13 | 2.12  |
| 00272        | 1.35  | 2.09  |
| 01002        | -0.8  | 2.08  |
| 02329        | 1.11  | 2.08  |
| 03118        | 1.82  | 2.08  |
| 03120        | 1.58  | 2.08  |
| 00267        | 1.13  | 2.07  |
| 02252        | -0.92 | 2.06  |
| 02409        | 0.54  | 2.03  |
| 00013        | 0.32  | 2.02  |
| 00985        | 0.58  | 2.01  |
| <i>clpV</i>  | -1.6  | -2    |
| <i>gltD</i>  | -0.78 | -2    |
| <i>01112</i> | -1.45 | -2.01 |
| 01115        | -1.04 | -2.04 |
| 01111        | -1.51 | -2.07 |
| 01116        | -1.2  | -2.09 |
| <i>icmF</i>  | -1.53 | -2.09 |
| 00650        | -1.88 | -2.19 |
| <i>01117</i> | -1.59 | -2.19 |
| 104310       | -1.51 | -2.26 |
| 00579        | -0.68 | -2.3  |

|             |       |       |
|-------------|-------|-------|
| 00600       | -1.74 | -2.31 |
| 00722       | -1.9  | -2.39 |
| 00231       | -0.47 | -2.42 |
| <i>gabT</i> | -0.68 | -2.48 |
| 00649       | -1.87 | -2.61 |
| <i>gltB</i> | -1.67 | -2.7  |
| 104800      | 1.88  | -2.84 |

\*Locus is preceded by HMPREF0010\_ for unannotated genes

**Table S6: Strains and Plasmids**

| <b>Strain</b>                                      | <b>Genotype</b>                                                          | <b>Reference</b>                           |
|----------------------------------------------------|--------------------------------------------------------------------------|--------------------------------------------|
| <i>E. coli</i> W3110                               | Wild type, F- $\lambda$ -, <i>rph-1</i> IN( <i>rrnD</i> , <i>rrnE</i> )1 | <i>E. coli</i> Genetic Stock Center (Yale) |
| <i>A. baumannii</i> ATCC19606                      | Wild type                                                                | ATCC                                       |
| <i>A. baumannii</i> 5075                           | Wild type                                                                | ATCC                                       |
| <i>A. baumannii</i> AYE                            | Wild type                                                                | ATCC                                       |
| <i>A. baumannii</i> ATCC19606                      | $\Delta mlaE$ , $\Delta pldA$                                            | This Study                                 |
| <i>A. baumannii</i> ATCC19606, LOS-                | $\Delta mlaE$ , $\Delta pldA$                                            | This Study                                 |
| <i>A. baumannii</i> ATCC19606, LOS+                | $\Delta mlaE$                                                            | This Study                                 |
| <i>A. baumannii</i> ATCC19606, LOS-                | $\Delta mlaE$                                                            | This Study                                 |
| <i>A. baumannii</i> ATCC19606, LOS+                | $\Delta mlaE$ , $\Delta pldA$ , pMMB67EHKn- <i>m</i> <i>laE</i>          | This Study                                 |
| <i>A. baumannii</i> ATCC19606, LOS-                | $\Delta mlaE$ , $\Delta pldA$ , pMMB67EHKn- <i>m</i> <i>laE</i>          | This Study                                 |
| <i>A. baumannii</i> 5075 LOS- Ancestor Pop 1       | See Table S3                                                             | This Study                                 |
| <i>A. baumannii</i> 5075 LOS- Ancestor Pop 2       | See Table S3                                                             | This Study                                 |
| <i>A. baumannii</i> 5075 LOS- Ancestor Pop 3       | See Table S3                                                             | This Study                                 |
| <i>A. baumannii</i> 5075 LOS- Ancestor Pop 4       | See Table S3                                                             | This Study                                 |
| <i>A. baumannii</i> AYE LOS- Ancestor Pop 5        | See Table S3                                                             | This Study                                 |
| <i>A. baumannii</i> AYE LOS- Ancestor Pop 6        | See Table S3                                                             | This Study                                 |
| <i>A. baumannii</i> AYE LOS- Ancestor Pop 7        | See Table S3                                                             | This Study                                 |
| <i>A. baumannii</i> ATCC19606 LOS- Ancestor Pop 8  | See Table S3                                                             | This Study                                 |
| <i>A. baumannii</i> ATCC19606 LOS- Ancestor Pop 9  | See Table S3                                                             | This Study                                 |
| <i>A. baumannii</i> ATCC19606 LOS- Ancestor Pop 10 | See Table S3                                                             | This Study                                 |
| <i>A. baumannii</i> 5075 LOS+ Evolved Pop 1        | See Table S3                                                             | This Study                                 |
| <i>A. baumannii</i> 5075 LOS+ Evolved Pop 2        | See Table S3                                                             | This Study                                 |
| <i>A. baumannii</i> 5075 LOS+ Evolved Pop 3        | See Table S3                                                             | This Study                                 |
| <i>A. baumannii</i> 5075 LOS+ Evolved Pop 4        | See Table S3                                                             | This Study                                 |
| <i>A. baumannii</i> AYE LOS+ Evolved Pop 5         | See Table S3                                                             | This Study                                 |
| <i>A. baumannii</i> AYE LOS+ Evolved Pop 6         | See Table S3                                                             | This Study                                 |

|                                                   |                                                          |                  |
|---------------------------------------------------|----------------------------------------------------------|------------------|
| <i>A. baumannii</i> AYE LOS+ Evolved Pop 7        | See Table S3                                             | This Study       |
| <i>A. baumannii</i> ATCC19606 LOS+ Evolved Pop 8  | See Table S3                                             | This Study       |
| <i>A. baumannii</i> ATCC19606 LOS+ Evolved Pop 9  | See Table S3                                             | This Study       |
| <i>A. baumannii</i> ATCC19606 LOS+ Evolved Pop 10 | See Table S3                                             | This Study       |
| <i>A. baumannii</i> 5075 LOS- Evolved Pop 1       | See Table S2                                             | This Study       |
| <i>A. baumannii</i> 5075 LOS- Evolved Pop 2       | See Table S2                                             | This Study       |
| <i>A. baumannii</i> 5075 LOS- Evolved Pop 3       | See Table S2                                             | This Study       |
| <i>A. baumannii</i> 5075 LOS- Evolved Pop 4       | See Table S2                                             | This Study       |
| <i>A. baumannii</i> AYE LOS- Evolved Pop 5        | See Table S2                                             | This Study       |
| <i>A. baumannii</i> AYE LOS- Evolved Pop 6        | See Table S2                                             | This Study       |
| <i>A. baumannii</i> AYE LOS- Evolved Pop 7        | See Table S2                                             | This Study       |
| <i>A. baumannii</i> ATCC19606 LOS- Evolved Pop 8  | See Table S2                                             | This Study       |
| <i>A. baumannii</i> ATCC19606 LOS- Evolved Pop 9  | See Table S2                                             | This Study       |
| <i>A. baumannii</i> ATCC19606 LOS- Evolved Pop 10 | See Table S2                                             | This Study       |
| <b>Plasmid</b>                                    | <b>Description</b>                                       | <b>Reference</b> |
| pMMB67EHKn                                        | pMMB67EH with Kan <sup>R</sup>                           | 30               |
| pMMB67EHKn- <i>mIaE</i>                           | pMMB67EH with <i>mIaE</i>                                | This Study       |
| pRecABtet                                         | pMMB67EH with REC <sub>AB</sub> system, tet <sup>R</sup> | 44               |
| pFLPtet                                           | pMMB67EH with FLP recombinase, tet <sup>R</sup>          | 44               |
| pKD4                                              | FRT-flanked Kan <sup>R</sup>                             | 44               |

**Table S7: Primers**

| Primer                        | Sequence                                                                                                                                                                                                  |
|-------------------------------|-----------------------------------------------------------------------------------------------------------------------------------------------------------------------------------------------------------|
| Recombineering_F_ <i>pldA</i> | 5'-<br>TAAGTTTGACCTATAAAAATGCCGCTTTTACAGCGGCTTTT<br>TTATTAACCAATTTGAATATTGGCTTGAGGGTGTTTGAGAC<br>GGCTTTTTTTAGGAGTAGCAATTAATAGGCGAGTGTTAA<br>GGGCCTAACGGCCTGCAAACATAAGTATATCCTCCTTA<br>GTTCCATTCCG         |
| Recombineering_R_ <i>pldA</i> | 5'-<br>TTTAGAAGATTTAAAACGTGTTGCACGTCAATATTTAATTG<br>AACAAACACCTGTAAAAGCTGTCGTTGCACCTTTTGCAAAA<br>CGTGATGAATTGCAACAACACTGGGCTTTACGATCAAACAAG<br>TTAATTAATAAAAATTGGAGATGAACAGCGATTGTGTAG<br>GCTGGAGCTGCTTCG |
| Recombineering_F_ <i>mlaE</i> | 5'-<br>GGTACACCTGAGCAACTCAAGGCACATGCTTCTCCATTTG<br>TAAAACAGTTCTTAACCGTTTCGGTAGAAGGTCCGGTTGA<br>ATATCAGTTTAGCCACCAAGCTTATTTAGATAACGAGGTTT<br>GTCCTATATCCTCCTTAGTTCCATTCCG                                  |
| Recombineering_R_ <i>mlaE</i> | 5'-<br>GGTGTAGCCATCGCTCAAGTTCGTGCCCACTAAACCACTC<br>ACTTTCATTGCTAAAAAGAATAAAGCGATACCGAAGATAAT<br>GACAAAGATACCTACGGCCAGCTCACTAGTACGTGATTTT<br>ACAGCGATTGTGTAGGCTGGAGCTGCTTCG                                |
| Promoter_ <i>mlaA</i> _F      | 5'- CAAATAAACTTCGAGTAATTTAAAC                                                                                                                                                                             |
| Coding Region_ <i>mlaA</i> _R | 5'- TTTTTCGGTTTTATCAGTGTTATC                                                                                                                                                                              |
| pMMB67EHKn- <i>mlaE</i> _F    | 5'- CCGGAATTCATGAATACGATTGCCTGG*                                                                                                                                                                          |
| pMMB67EHKn- <i>mlaE</i> _R    | 5'- CGCGGATCCTTAAATCCCTCCGAACATG*                                                                                                                                                                         |
